# Supplementary material
Source: publisher site journal article supplement (https://www.dovepress.com/article/supplementary_file/551357/551357%20Revised%20%2509Supplementary%20tables.docx)
Supplement: Supplementary file 1 [file 551357%20Revised%20%2509Supplementary%20tables.docx]

**Supplementary Table S1 Covariates and Definitions**

| **Covariate** | **Description** |
| --- | --- |
| **Age** | Treated as a continuous variable; categorized into three groups for subgroup analysis: <45 years, 45–60 years, and ≥60 years. |
| **Race/Ethnicity** | Categorized as: Mexican American, Other Hispanic, Non-Hispanic White, Non-Hispanic Black, and Other races. |
| **Marital Status** | Classified as: married/living with partner, widowed/divorced/separated, and never married. |
| **Poverty Income Ratio (PIR)** | The ratio of household income to the federal poverty threshold; grouped as <1.3, 1.3–3.5, and >3.5. |
| **Physical Activity** | Defined based on whether the participant engaged in vigorous activity during the past 30 days: yes or no. |
| **Smoking Behavior** | Categorized as non-smoker or smoker, based on the response to: "Have you smoked at least 100 cigarettes in your lifetime?" |
| **Alcohol Consumption** | Defined as current drinking or not, based on the question: "Do you drink 4–5 or more alcoholic beverages daily?" |
| **Body Mass Index (BMI)** | Categorized as <25 kg/m², 25–30 kg/m², and ≥30 kg/m². |
| **Hypertension** | Defined as "yes" if any of the following were met: self-reported hypertension, history of being told to take antihypertensive medication, or current use. |
| **Diabetes** | Defined as "yes" if any of the following were met: self-reported diabetes, current use of insulin or antidiabetic medication, fasting glucose ≥7.0 mmol/L, or HbA1c ≥6.5%. |
| **Cardiovascular Disease** | Defined as "yes" if the participant had ever been told they had heart failure, coronary heart disease, angina, myocardial infarction, or stroke. |
| **History of Cesarean Section** | Based on the response to "How many cesarean deliveries have you had?" Those with 0 were defined as having no history of cesarean section. |
| **Number of Vaginal Deliveries** | Grouped as 0, 1–2, and ≥3 based on the response to "How many vaginal deliveries have you had?" |
| **Hormone Use** | Defined as "yes" or "no" based on the question: "Have you ever used female hormones such as estrogen or progesterone?" |
| **Hysterectomy** | Defined as "yes" or "no" based on the question: "Have you had a hysterectomy?" |

Supplementary Table S2. Weighted Multivariable Logistic Regression Analyses of the Association Between NHHR and UI

|  | Model 1  OR(95%CI) | Model 2  OR(95%CI) | Model 3  OR(95%CI) |
| --- | --- | --- | --- |
| SUI |  |  |  |
| NHHR | 1.184 (1.109, 1.264) <0.001 | 1.177 (1.100, 1.260) <0.001 | 1.116(1.042, 1.196) 0.002 |
| Q1  <1.78 | Ref. | Ref. | Ref. |
| Q2  1.78-2.38 | 1.066 (0.859, 1.323) 0.557 | 1.048 (0.841, 1.306)  0.673 | 0.942 (0.757, 1.173) 0.590 |
| Q3  2.38-3.31 | 1.453 (1.138, 1.855) <0.003 | 1.350 (1.039, 1.755)  0.025 | 1.176 (0.910, 1.520) 0.213 |
| Q4  >3.31 | 1.799(1.391, 2.328) <0.001 | 1.756 (1.337, 2.306) <0.001 | 1.412 (1.066, 1.870) 0.017 |
| p for trend | <0.001 | <0.001 | 0.005 |
| UUI |  |  |  |
| NHHR | 1.060 (0.993, 1.131) 0.080 | 1.037 (0.963, 1.116)  0.332 | 0.984 (0.903, 1.072) 0.710 |
| Q1  <1.78 | Ref. | Ref. | Ref. |
| Q2  1.78-2.38 | 1.043 (0.804, 1.353) 0.747 | 0.987 (0.743, 1.311)  0.929 | 0.899 (0.681, 1.187) 0.450 |
| Q3  2.38-3.31 | 1.370 (1.060, 1.770) 0.016 | 1.222 (0.935, 1.598)  0.141 | 1.032 (0.788, 1.351) 0.819 |
| Q4  >3.31 | 1.174 (0.908, 1.518) 0.217 | 1.059 (0.793, 1.416)  0.694 | 0.836 (0.612, 1.142) 0.256 |
| p for trend | 0.068 | 0.396 | 0.447 |
| MUI |  |  |  |
| NHHR | 1.152 (1.064, 1.248) <0.001 | 1.132 (1.037, 1.237) <0.006 | 1.082 (0.979, 1.196) 0.123 |
| Q1  <1.78 | Ref. | Ref. | Ref. |
| Q2  1.78-2.38 | 0.964 (0.685, 1.358) 0.834 | 0.915 (0.641, 1.306)  0.622 | 0.817 (0.578, 1.154) 0.248 |
| Q3  2.38-3.31 | 1.369 (0.991, 1.891) 0.057 | 1.227 (0.882, 1.708)  0.222 | 1.051 (0.754, 1.466) 0.767 |
| Q4  >3.31 | 1.570 (1.109, 2.223) <0.011 | 1.438 (0.988, 2.094) <0.058 | 1.132 (0.761, 1.685) 0.536 |
| p for trend | 0.003 | 0.023 | 0.313 |

Model 1: Unadjusted.
Model 2: Adjusted for age, ethnicity, marital status, and poverty income ratio (PIR).
Model 3: Fully adjusted for all covariates.

Abbreviation: NHHR: Non-High-Density Lipoprotein Cholesterol to High-Density Lipoprotein Cholesterol Ratio; SUI: Stress Urinary Incontinence; UUI: Urge Urinary Incontinence; MUI: Mixed Urinary Incontinence; Q1:Quartile 1; OR: Odds Ratio; CI: Confidence Interval

Supplementary Table S3. Weighted Multivariable Logistic Regression Analyses of the Association Between NHHR Quartiles and Urinary Incontinence (Tertiles)

|  | Model 1  OR(95%CI) | Model 2  OR(95%CI) | Model 3  OR(95%CI) |
| --- | --- | --- | --- |
| SUI |  |  |  |
| NHHR | 1.184 (1.109, 1.264) <0.001 | 1.177 (1.100, 1.260) <0.001 | 1.116 (1.042, 1.196) 0.002 |
| T1  <1.99 | Ref. | Ref. | Ref. |
| T2  1.99-2.92 | 1.196 (0.973, 1.470) 0.088 | 1.129 (0.911, 1.398)  0.264 | 1.032 (0.833, 1.278)  0.772 |
| T3  >2.92 | 1.858(1.487,2.321)  <0.001 | 1.790 (1.419, 2.259)  <0.001 | 1.509 (1.185, 1.922)  <0.001 |
| p for trend | <0.001 | <0.001 | <0.001 |
| UUI |  |  |  |
| NHHR | 1.060 (0.993, 1.131)  0.080 | 1.037 (0.963, 1.116)  0.332 | 0.984 (0.903, 1.072)  0.710 |
| T1  <1.99 | Ref. | Ref. | Ref. |
| T2  1.99-2.92 | 1.187 (0.941, 1.498)  0.146 | 1.067 (0.831, 1.371)  0.605 | 0.948 (0.736, 1.221) 0.677 |
| T3  >2.92 | 1.154 (0.917, 1.453)  0.219 | 1.048 (0.806, 1.363)  0.723 | 0.848 (0.641, 1.123) 0.248 |
| p for trend | 0.216 | 0.726 | 0.242 |
| MUI |  |  |  |
| NHHR | 1.152 (1.064, 1.248)  <0.001 | 1.132 (1.037, 1.237)  0.006 | 1.082 (0.979, 1.196)  0.123 |
| T1  <1.99 | Ref. | Ref. | Ref. |
| T2  1.99-2.92 | 1.210 (0.935, 1.564)  0.145 | 1.098 (0.838, 1.439)  0.494 | 0.991 (0.758, 1.294)  0.944 |
| T3  >2.92 | 1.500 (1.105, 2.036)  0.010 | 1.385 (0.993, 1.930)  0.055 | 1.134 (0.796, 1.616) 0.483 |
| p for trend | 0.010 | 0.054 | 0.463 |

Model 1: Unadjusted.
Model 2: Adjusted for age, ethnicity, marital status, and poverty income ratio (PIR).
Model 3: Fully adjusted for all covariates.

Abbreviation: NHHR: Non-High-Density Lipoprotein Cholesterol to High-Density Lipoprotein Cholesterol Ratio; SUI: Stress Urinary Incontinence; UUI: Urge Urinary Incontinence; MUI: Mixed Urinary Incontinence; T1: Tertile 1; OR: Odds Ratio; CI: Confidence Interval.
